# Supplementary material
Source: Royal Society of Chemistry journal article supplement (doi:10.1039/d6va00121a)
Supplement: d6va00121a1.pdf [file d6va00121a1.pdf]

## **Upcycling of PET-based plastic bottles into carbon dots for photocatalytic degradation of reactive black five using response surface methodology**

Seemab Javed<sup>1,4</sup>, Shahzad Ali Shahid Chatha<sup>1\*</sup>, Shafqat Ali<sup>2,3</sup>, Aman Ullah<sup>4\*</sup>

<sup>1</sup>Department of Chemistry, Government College University, Faisalabad-38000, Pakistan

<sup>2</sup>Department of Environmental Science, Government College University, Faisalabad-38000, Pakistan

<sup>3</sup>Department of Biological Sciences and Technology, China Medical University, Taichung 40402, Taiwan

<sup>4</sup>Department of Agricultural, Life & Environmental Sciences, University of Alberta, T6G 2G7, Canada

### **Correspondence:**

Shahzad Ali Shahid Chatha

chatha222@gmail.com

Aman Ullah

ullah2@ualberta.ca

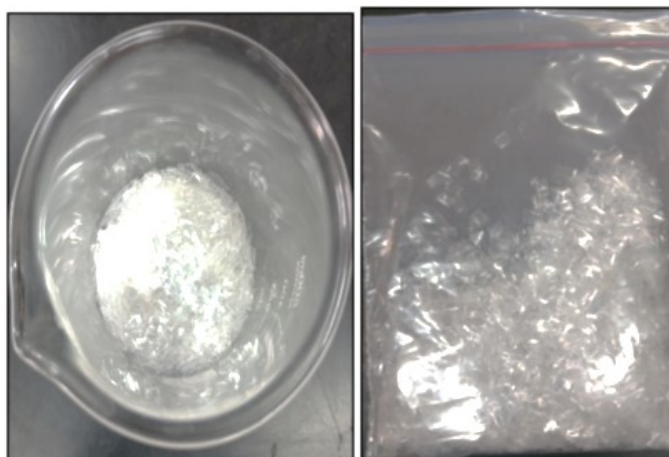

**Fig S1:** PET bottle waste in crushed form serves as the raw material for producing carbon dots.

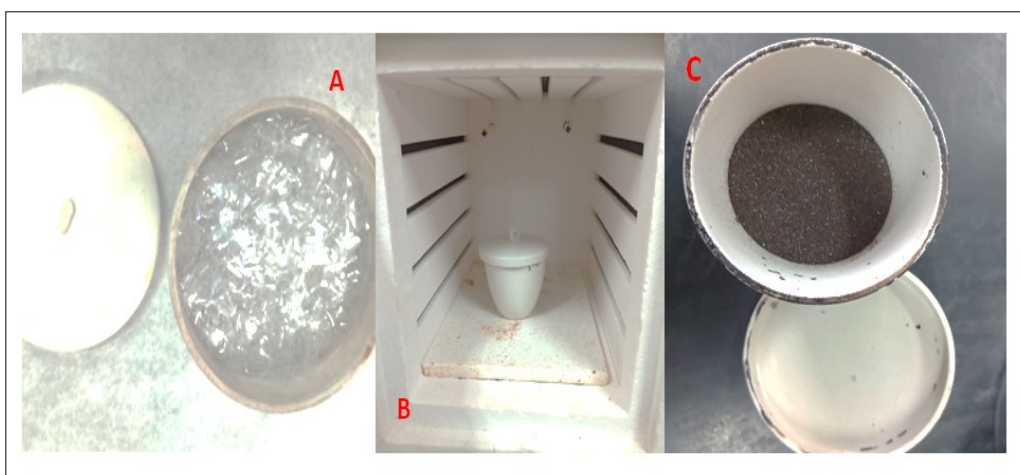

**Fig S2:** Calcination step in the synthesis of carbon dots from PET waste. (A) PET plastic shredded, (B) treatment in a muffle furnace, (C) Final black carbonaceous thermally treated residue

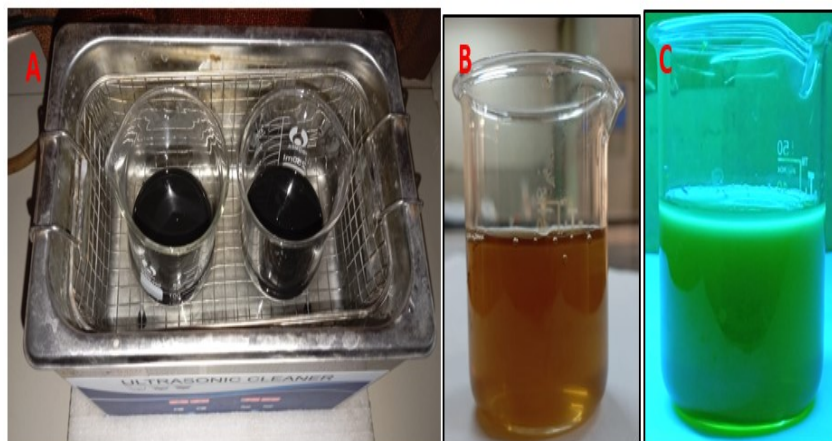

**Fig S3:** Sonication process for synthesizing carbon dots (A), their dispersion seen under daylight (B), and the characteristic green fluorescence of carbon dots under UV light (C)

**Table S1:** The calibration of Reactive Black 5 (RB5) at its  $\lambda$  max absorbance ( $n = 3$ ) of the standards (0-30 mg/L) with the mean absorbance (Mean A) and a standard deviation (SD).

| RB5 (mg/L) | Absorbance 1 | Absorbance2 | Absorbance3 | Mean A  | SD (n=3) |
|------------|--------------|-------------|-------------|---------|----------|
| 0          | 0.00521      | 0.01545     | 0.00426     | 0.00831 | 0.00620  |
| 5          | 0.09744      | 0.09550     | 0.09942     | 0.09745 | 0.00196  |
| 10         | 0.19351      | 0.19774     | 0.20323     | 0.19816 | 0.00487  |
| 15         | 0.31827      | 0.30226     | 0.30037     | 0.30697 | 0.00983  |
| 20         | 0.40582      | 0.41827     | 0.39045     | 0.40485 | 0.01394  |
| 25         | 0.50291      | 0.49760     | 0.50154     | 0.50068 | 0.00276  |
| 30         | 0.60548      | 0.60219     | 0.59578     | 0.60115 | 0.00493  |

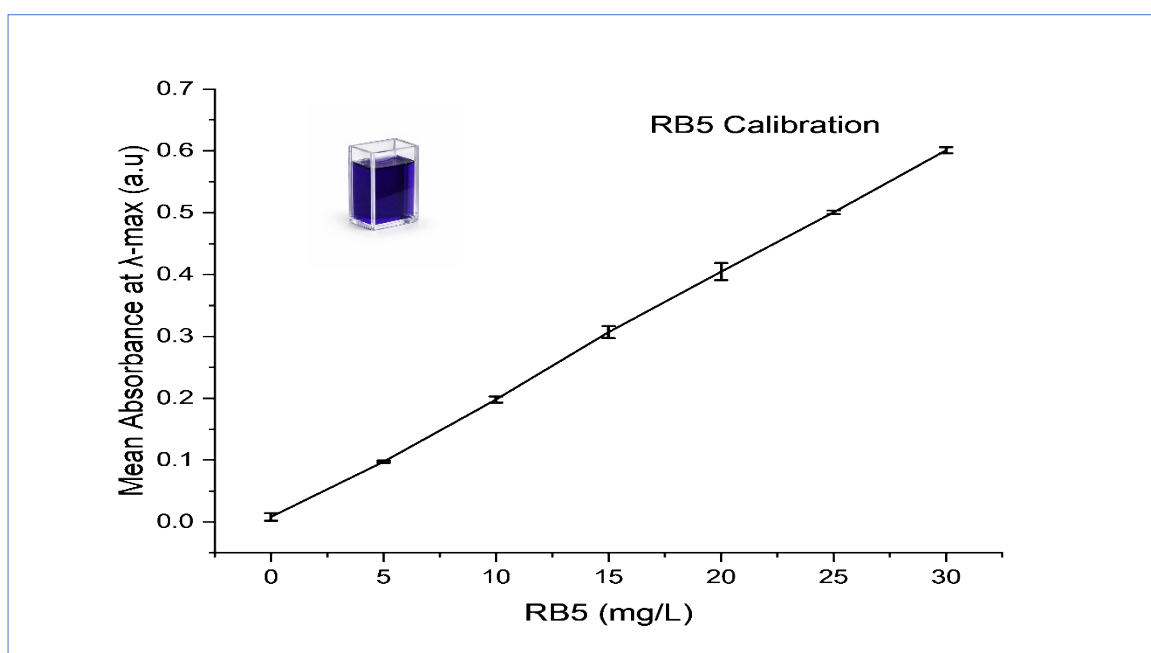

**Fig S4:** Calibration curve of RB5 absorbance at lambda max

**Table S2:** RSM experimental design for optimization of photocatalytic degradation of RB5

| Factor | Name              | Units   | Type    | Minimum | Maximum | Coded Low  | Coded High  | Mean   | Std. Dev. |
|--------|-------------------|---------|---------|---------|---------|------------|-------------|--------|-----------|
| A      | Carbon dots dose  | g/L     | Numeric | 0.2000  | 0.8000  | -1 ↔ 0.20  | +1 ↔ 0.80   | 0.5000 | 0.1964    |
| B      | Dye concentration | mg/L    | Numeric | 10.00   | 50.00   | -1 ↔ 10.00 | +1 ↔ 50.00  | 30.00  | 13.09     |
| C      | pH                |         | Numeric | 5.00    | 11.00   | -1 ↔ 5.00  | +1 ↔ 11.00  | 8.00   | 1.96      |
| D      | Time              | Minutes | Numeric | 30.00   | 120.00  | -1 ↔ 30.00 | +1 ↔ 120.00 | 75.00  | 29.46     |

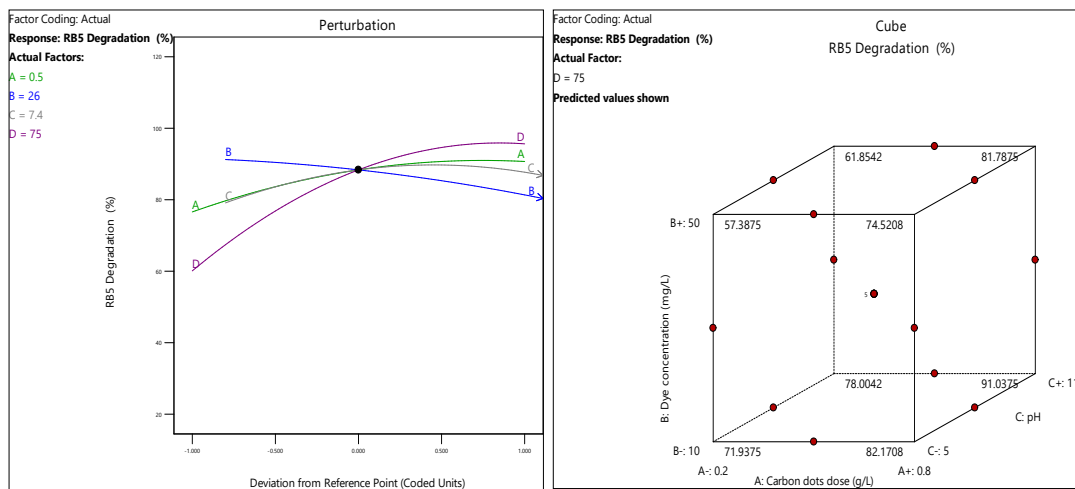

**Fig S5:** A disturbance plot of the relative sensitivity of RB5 degradation (%) to factors A, B, C, and D about the reference conditions. A cube plot of the predicted RB5 degradation (%) under the model at the corners of the experimental design space

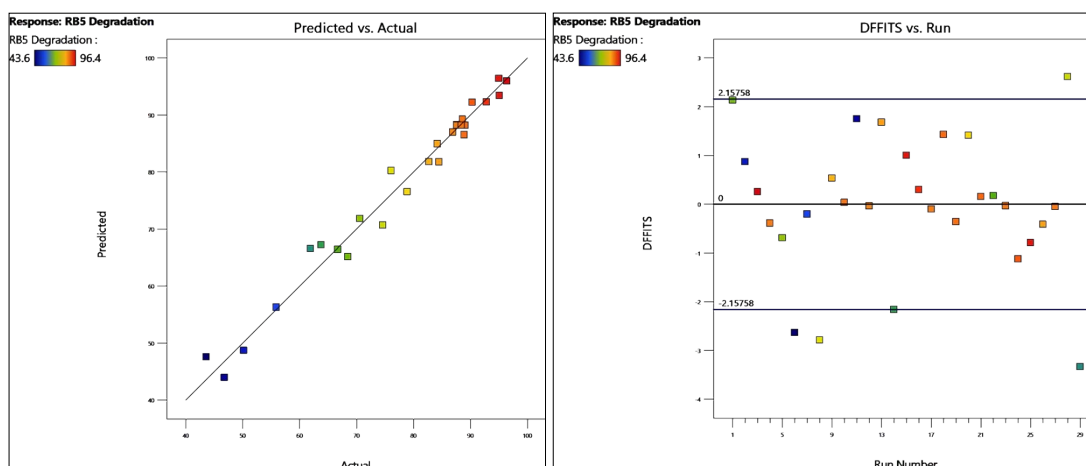

**Fig S6:** Diagnostic plots of the RB5 degradation model with DFFITS against the run number (left) to indicate influential observations and predict against actual values (right) to measure the overall fit of the model

**Table S3:** Pseudo–first-order kinetic parameters for RB5 photodegradation at different predicted degradation times for 75 minutes.

| Predicted degradation (%) | $C_t/C_0$ | $\ln(C_0/C_t)$ | $K_{app}$ ( $\text{min}^{-1}$ ) | $t_{1/2}$ (min) |
|---------------------------|-----------|----------------|---------------------------------|-----------------|
| 57.3875                   | 0.4261    | 0.853          | 0.01137                         | 60.9            |
| 71.9375                   | 0.2806    | 1.2707         | 0.01694                         | 40.9            |
| 74.5208                   | 0.2548    | 1.3673         | 0.01823                         | 38              |
| 82.1708                   | 0.1783    | 1.7243         | 0.02299                         | 30.1            |
| 91.0375                   | 0.0896    | 2.4121         | 0.03216                         | 21.6            |

**Table Ssupplementarysupplementary4:** Fit Summary, Response: RB5 Degradation of RSM

| Source           | Sequential p-value | Lack of Fit p-value | Adjusted $R^2$ | Predicted $R^2$ |                  |
|------------------|--------------------|---------------------|----------------|-----------------|------------------|
| Linear           | < 0.0001           | < 0.0001            | 0.7926         | 0.7586          |                  |
| 2FI              | 0.9153             | < 0.0001            | 0.7505         | 0.6367          |                  |
| <b>Quadratic</b> | <b>&lt; 0.0001</b> | <b>0.0014</b>       | <b>0.9580</b>  | <b>0.8799</b>   | <b>Suggested</b> |
| Cubic            | 0.8792             | 0.0002              | 0.9366         | -0.9264         | <b>Aliased</b>   |
